# Supplementary material
Source: publisher figshare collection journal article supplement (https://sage.figshare.com/ndownloader/files/15460202)
Supplement: Supplementary file 1 [file 15460202]

**Supplementary****Table 1.**

Summary of means (SD) for SCR magnitude to CS+paired trials during the acquisition and reversal phases

| Acquisition                               |             |
|-------------------------------------------|-------------|
| Measure                                   | Early       |
| SCR magnitude<br>( $\sqrt{\mu\text{S}}$ ) | 0.16 (0.53) |

Note: SCR magnitude ( $\sqrt{\mu\text{S}}$ ), square root transformed and zscored skin conductance magnitude measured in microSiemens
